# Supplementary material for: HOXB2 Is a Prognostic Biomarker and Correlated with Immune Infiltration in Colorectal Cancer and Glioma
Source: Research Square preprint supplement (doi:10.21203/rs.3.rs-2898626/v1), 2023-05-17
Supplement: Supplementary file 1 [file 0371cdcbf1982ec0bc4b070f.xlsx]

## Sheet: ST1
Supplementary Table 1: The relationships between HOXB2 expression and prognosis in various cancers evaluated by PrognoScan.
TYPE	ID_NAME	ID_DESCRIPTION	DATA_POSTPROCESSING	DATASET	CANCER TYPE	SUBTYPE	ENDPOINT	COHORT	CONTRIBUTOR	ARRAY TYPE	PROBE ID	N	CUTPOINT	MINIMUM P-VALUE	CORRECTED P-VALUE	ln(HR-high / HR-low)	COX P-VALUE	ln(HR)	HR [95% CI-low CI-upp]
GENE	HOXB2	homeobox B2	None	GSE5287	Bladder cancer		Overall Survival	Aarhus (1995-2004)	Als	HG-U133A	205453_at	30	0.733333	0.108938	-	0.71443	0.979433	0.0114038	1.01 [0.43 - 2.41]
GENE	HOXB2	homeobox B2	None	GSE13507	Bladder cancer		Overall Survival	CNUH	Kim	Human-6 v2	ILMN_1810274	165	0.478788	0.00781955	0.133949	-0.642658	0.0924142	-0.182427	0.83 [0.67 - 1.03]
GENE	HOXB2	homeobox B2	None	GSE13507	Bladder cancer	Transitional cell carcinoma	Disease Specific Survival	CNUH	Kim	Human-6 v2	ILMN_1810274	165	0.478788	0.00693623	0.122153	-0.99142	0.141885	-0.241582	0.79 [0.57 - 1.08]
GENE	HOXB2	homeobox B2	None	GSE12417-GPL96	Blood cancer	AML	Overall Survival	AMLCG (1999-2003)	Metzeler	HG-U133A	205453_at	163	0.711656	0.000519501	0.0146408	0.703608	0.0763278	0.224964	1.25 [0.98 - 1.61]
GENE	HOXB2	homeobox B2	None	GSE12417-GPL570	Blood cancer	AML	Overall Survival	AMLCG (2004)	Metzeler	HG-U133_Plus_2	205453_at	79	0.329114	0.0863402	-	-0.50645	0.570818	-0.0660015	0.94 [0.75 - 1.18]
GENE	HOXB2	homeobox B2	None	GSE5122	Blood cancer	AML	Overall Survival	San Diego	Raponi	HG-U133A	205453_at	58	0.155172	0.0273369	0.332731	-0.814195	0.106485	-0.217925	0.80 [0.62 - 1.05]
GENE	HOXB2	homeobox B2	None	GSE8970	Blood cancer	AML	Overall Survival	San Diego	Raponi	HG-U133A	205453_at	34	0.676471	0.0096192	0.156804	1.02554	0.428462	0.205981	1.23 [0.74 - 2.05]
GENE	HOXB2	homeobox B2	None	GSE4475	Blood cancer	B-cell lymphoma	Overall Survival	Berlin (2003-2005)	Hummel	HG-U133A	205453_at	158	0.158228	0.0124334	0.189962	-0.677961	0.604527	-0.284119	0.75 [0.26 - 2.21]
GENE	HOXB2	homeobox B2	None	E-TABM-346	Blood cancer	DLBCL	Overall Survival	GELA (1998-2000)	Jais	HG-U133A	205453_at	53	0.377358	0.0956167	-	0.676458	0.472682	0.19396	1.21 [0.72 - 2.06]
GENE	HOXB2	homeobox B2	None	E-TABM-346	Blood cancer	DLBCL	Event Free Survival	GELA (1998-2000)	Jais	HG-U133A	205453_at	53	0.377358	0.0626311	-	0.710999	0.560997	0.144226	1.16 [0.71 - 1.88]
GENE	HOXB2	homeobox B2	None	GSE16131-GPL96	Blood cancer	Follicular lymphoma	Overall Survival	NCI (1974-2001)	Dave	HG-U133A	205453_at	180	0.333333	0.0324109	0.372977	-0.452076	0.0396922	-0.417436	0.66 [0.44 - 0.98]
GENE	HOXB2	homeobox B2	None	GSE2658	Blood cancer	Multiple myeloma	Disease Specific Survival	Arkansas	Zhan	HG-U133_Plus_2	205453_at	559	0.899821	0.183938	-	-0.552614	0.596081	-0.0538028	0.95 [0.78 - 1.16]
GENE	HOXB2	homeobox B2	None	GSE4271-GPL96	Brain cancer	Astrocytoma	Overall Survival	MDA	Phillips	HG-U133A	205453_at	77	0.194805	0.299512	-	0.345274	0.797115	0.0274362	1.03 [0.83 - 1.27]
GENE	HOXB2	homeobox B2	None	GSE7696	Brain cancer	Glioblastoma	Overall Survival	Lausanne	Murat	HG-U133_Plus_2	205453_at	70	0.557143	0.099202	-	-0.439007	0.743168	0.0440377	1.05 [0.80 - 1.36]
GENE	HOXB2	homeobox B2	None	MGH-glioma	Brain cancer	Glioma	Overall Survival	CBTTB, MGH, BWH, CH	Nutt	HG-U95A	39610_at	50	0.16	0.0730705	-	1.2332	0.723346	0.0851645	1.09 [0.68 - 1.74]
GENE	HOXB2	homeobox B2	None	GSE4412-GPL96	Brain cancer	Glioma	Overall Survival	UCLA (1996-2003)	Freije	HG-U133A	205453_at	74	0.72973	2.90156e-05	0.00116643	1.24054	0.00779563	0.330752	1.39 [1.09 - 1.78]
GENE	HOXB2	homeobox B2	None	GSE16581	Brain cancer	Meningioma	Overall Survival	UCLA	Lee	HG-U133_Plus_2	205453_at	67	0.492537	0.191087	-	0.904873	0.964153	-0.0212717	0.98 [0.39 - 2.48]
GENE	HOXB2	homeobox B2	None	GSE19615	Breast cancer		Distant Metastasis Free Survival	DF/HCC	Li	HG-U133_Plus_2	205453_at	115	0.365217	0.0628915	-	1.3205	0.932124	0.0239495	1.02 [0.59 - 1.78]
GENE	HOXB2	homeobox B2	None	GSE3143	Breast cancer		Overall Survival	Duke	Bild	HG-U95A	39610_at	158	0.620253	0.000996524	0.0254109	-1.11627	0.0100613	-0.311902	0.73 [0.58 - 0.93]
GENE	HOXB2	homeobox B2	None	GSE7849	Breast cancer		Disease Free Survival	Duke (1990-2001)	Anders	HG-U95A	39610_at	76	0.763158	0.187553	-	0.682004	0.679457	0.0837378	1.09 [0.73 - 1.62]
GENE	HOXB2	homeobox B2	None	GSE12276	Breast cancer		Relapse Free Survival	EMC	Bos	HG-U133_Plus_2	205453_at	204	0.612745	0.0234428	0.299438	-0.323299	0.0663342	-0.1213	0.89 [0.78 - 1.01]
GENE	HOXB2	homeobox B2	None	GSE6532-GPL570	Breast cancer		Relapse Free Survival	GUYT	Loi	HG-U133_Plus_2	205453_at	87	0.241379	0.00946016	0.154841	-0.969299	0.283053	-0.162887	0.85 [0.63 - 1.14]
GENE	HOXB2	homeobox B2	None	GSE6532-GPL570	Breast cancer		Distant Metastasis Free Survival	GUYT	Loi	HG-U133_Plus_2	205453_at	87	0.241379	0.00946016	0.154841	-0.969299	0.283053	-0.162887	0.85 [0.63 - 1.14]
GENE	HOXB2	homeobox B2	None	GSE9195	Breast cancer		Distant Metastasis Free Survival	GUYT2	Loi	HG-U133_Plus_2	205453_at	77	0.376623	0.0990848	-	-1.02133	0.901369	0.0359555	1.04 [0.59 - 1.83]
GENE	HOXB2	homeobox B2	None	GSE9195	Breast cancer		Relapse Free Survival	GUYT2	Loi	HG-U133_Plus_2	205453_at	77	0.155844	0.100262	-	15.3048	0.433682	0.209956	1.23 [0.73 - 2.09]
GENE	HOXB2	homeobox B2	None	GSE12093	Breast cancer		Distant Metastasis Free Survival	IO, NCI, TUM, CCF (1992-2000)	Zhang	HG-U133A	205453_at	136	0.227941	0.0737459	-	-0.830774	0.435086	-0.16764	0.85 [0.56 - 1.29]
GENE	HOXB2	homeobox B2	None	GSE11121	Breast cancer		Distant Metastasis Free Survival	Mainz (1988-1998)	Schmidt	HG-U133A	205453_at	200	0.11	0.132817	-	-0.611729	0.763079	0.0660402	1.07 [0.70 - 1.64]
GENE	HOXB2	homeobox B2	None	GSE1378	Breast cancer		Relapse Free Survival	MGH (1987-2000)	Ma	Arcturus 22k	17235	60	0.483333	0.134006	-	-0.576787	0.629153	-0.041675	0.96 [0.81 - 1.14]
GENE	HOXB2	homeobox B2	None	GSE1379	Breast cancer		Relapse Free Survival	MGH (1987-2000)	Ma	Arcturus 22k	17235	60	0.733333	0.1734	-	-0.670492	0.387098	-0.118892	0.89 [0.68 - 1.16]
GENE	HOXB2	homeobox B2	None	GSE9893	Breast cancer		Overall Survival	Montpellier, Bordeaux, Turin (1989-2001)	Chanrion	MLRG Human 21K V12.0	14141	155	0.890323	4.17758e-05	0.00161556	1.21684	7.07823e-05	0.383568	1.47 [1.21 - 1.77]
GENE	HOXB2	homeobox B2	None	GSE2034	Breast cancer		Distant Metastasis Free Survival	Rotterdam (1980-1995)	Wang	HG-U133A	205453_at	286	0.318182	0.0629093	-	-0.371157	0.227899	-0.14268	0.87 [0.69 - 1.09]
GENE	HOXB2	homeobox B2	None	GSE1456-GPL96	Breast cancer		Overall Survival	Stockholm (1994-1996)	Pawitan	HG-U133A	205453_at	159	0.150943	0.0652343	-	-0.685298	0.749076	-0.0609198	0.94 [0.65 - 1.37]
GENE	HOXB2	homeobox B2	None	GSE1456-GPL96	Breast cancer		Relapse Free Survival	Stockholm (1994-1996)	Pawitan	HG-U133A	205453_at	159	0.100629	0.0686996	-	-0.741344	0.629976	-0.0898703	0.91 [0.63 - 1.32]
GENE	HOXB2	homeobox B2	None	GSE1456-GPL96	Breast cancer		Disease Specific Survival	Stockholm (1994-1996)	Pawitan	HG-U133A	205453_at	159	0.899371	0.23198	-	0.579701	0.998187	0.000515049	1.00 [0.64 - 1.56]
GENE	HOXB2	homeobox B2	None	GSE7378	Breast cancer		Disease Free Survival	UCSF	Zhou	U133AAofAv2	205453_at	54	0.111111	0.0647307	-	-1.40353	0.683121	-0.114	0.89 [0.52 - 1.54]
GENE	HOXB2	homeobox B2	None	E-TABM-158	Breast cancer		Overall Survival	UCSF, CPMC (1989-1997)	Chin	HG-U133A	205453_at	117	0.358974	0.0372219	0.408344	0.746473	0.115931	0.225233	1.25 [0.95 - 1.66]
GENE	HOXB2	homeobox B2	None	E-TABM-158	Breast cancer		Distant Metastasis Free Survival	UCSF, CPMC (1989-1997)	Chin	HG-U133A	205453_at	117	0.247863	0.0159578	0.228012	1.59976	0.0454672	0.353042	1.42 [1.01 - 2.01]
GENE	HOXB2	homeobox B2	None	E-TABM-158	Breast cancer		Relapse Free Survival	UCSF, CPMC (1989-1997)	Chin	HG-U133A	205453_at	117	0.358974	0.0372219	0.408344	0.746473	0.115931	0.225233	1.25 [0.95 - 1.66]
GENE	HOXB2	homeobox B2	None	E-TABM-158	Breast cancer		Disease Specific Survival	UCSF, CPMC (1989-1997)	Chin	HG-U133A	205453_at	117	0.735043	0.00125865	0.030889	1.17238	0.01046	0.444215	1.56 [1.11 - 2.19]
GENE	HOXB2	homeobox B2	None	GSE3494-GPL96	Breast cancer		Disease Specific Survival	Uppsala (1987-1989)	Miller	HG-U133A	205453_at	236	0.211864	0.029492	0.350227	-0.63885	0.214986	-0.240587	0.79 [0.54 - 1.15]
GENE	HOXB2	homeobox B2	None	GSE4922-GPL96	Breast cancer		Disease Free Survival	Uppsala (1987-1989)	Ivshina	HG-U133A	205453_at	249	0.124498	0.00779035	0.133565	-0.719291	0.413015	-0.129455	0.88 [0.64 - 1.20]
GENE	HOXB2	homeobox B2	None	GSE2990	Breast cancer		Relapse Free Survival	Uppsala, Oxford	Sotiriou	HG-U133A	205453_at	62	0.548387	0.124607	-	-0.766827	0.305159	-0.196333	0.82 [0.56 - 1.20]
GENE	HOXB2	homeobox B2	None	GSE2990	Breast cancer		Distant Metastasis Free Survival	Uppsala, Oxford	Sotiriou	HG-U133A	205453_at	125	0.248	0.0225141	0.291147	-0.858379	0.148043	-0.397869	0.67 [0.39 - 1.15]
GENE	HOXB2	homeobox B2	None	GSE2990	Breast cancer		Relapse Free Survival	Uppsala, Oxford	Sotiriou	HG-U133A	205453_at	125	0.776	0.00322788	0.0668157	-1.31404	0.141065	-0.297943	0.74 [0.50 - 1.10]
GENE	HOXB2	homeobox B2	None	GSE2990	Breast cancer		Distant Metastasis Free Survival	Uppsala, Oxford	Sotiriou	HG-U133A	205453_at	54	0.685185	0.0256866	0.318899	-2.0189	0.122476	-0.363756	0.70 [0.44 - 1.10]
GENE	HOXB2	homeobox B2	None	GSE7390	Breast cancer		Overall Survival	Uppsala, Oxford, Stockholm, IGR, GUYT, CRH (1980-1998)	Desmedt	HG-U133A	205453_at	198	0.570707	0.00221652	0.0492694	-0.880814	0.023907	-0.21848	0.80 [0.66 - 0.97]
GENE	HOXB2	homeobox B2	None	GSE7390	Breast cancer		Relapse Free Survival	Uppsala, Oxford, Stockholm, IGR, GUYT, CRH (1980-1998)	Desmedt	HG-U133A	205453_at	198	0.590909	0.0715858	-	-0.389182	0.623656	-0.0391573	0.96 [0.82 - 1.12]
GENE	HOXB2	homeobox B2	None	GSE7390	Breast cancer		Distant Metastasis Free Survival	Uppsala, Oxford, Stockholm, IGR, GUYT, CRH (1980-1998)	Desmedt	HG-U133A	205453_at	198	0.459596	0.00604165	0.109753	-0.694891	0.0689455	-0.171265	0.84 [0.70 - 1.01]
GENE	HOXB2	homeobox B2	None	GSE12945	Colorectal cancer		Disease Free Survival	Berlin	Staub	HG-U133A	205453_at	51	0.72549	0.145908	-	-15.5809	0.659128	-0.558894	0.57 [0.05 - 6.85]
GENE	HOXB2	homeobox B2	None	GSE12945	Colorectal cancer		Overall Survival	Berlin	Staub	HG-U133A	205453_at	62	0.596774	0.1799	-	0.76688	0.70764	0.251804	1.29 [0.35 - 4.80]
GENE	HOXB2	homeobox B2	None	GSE17536	Colorectal cancer		Disease Specific Survival	MCC	Smith	HG-U133_Plus_2	205453_at	177	0.80226	0.000644297	0.0175855	0.942501	0.00273149	0.601395	1.82 [1.23 - 2.70]
GENE	HOXB2	homeobox B2	None	GSE17536	Colorectal cancer		Overall Survival	MCC	Smith	HG-U133_Plus_2	205453_at	177	0.774011	0.00599319	0.109066	0.684426	0.0463842	0.37683	1.46 [1.01 - 2.11]
GENE	HOXB2	homeobox B2	None	GSE17536	Colorectal cancer		Disease Free Survival	MCC	Smith	HG-U133_Plus_2	205453_at	145	0.889655	0.000149687	0.00499088	1.35876	0.0184666	0.603153	1.83 [1.11 - 3.02]
GENE	HOXB2	homeobox B2	None	GSE14333	Colorectal cancer		Disease Free Survival	Melbourne	Jorissen	HG-U133_Plus_2	205453_at	226	0.380531	0.0109694	0.173064	0.844547	0.0125145	0.386755	1.47 [1.09 - 1.99]
GENE	HOXB2	homeobox B2	None	GSE17537	Colorectal cancer		Overall Survival	VMC	Smith	HG-U133_Plus_2	205453_at	55	0.727273	0.00361006	0.0730885	1.23513	0.00779915	1.08752	2.97 [1.33 - 6.61]
GENE	HOXB2	homeobox B2	None	GSE17537	Colorectal cancer		Disease Free Survival	VMC	Smith	HG-U133_Plus_2	205453_at	55	0.672727	0.0257642	0.319559	1.08927	0.0635933	0.868942	2.38 [0.95 - 5.97]
GENE	HOXB2	homeobox B2	None	GSE17537	Colorectal cancer		Disease Specific Survival	VMC	Smith	HG-U133_Plus_2	205453_at	49	0.530612	0.0320412	0.370153	1.33133	0.0852115	0.897355	2.45 [0.88 - 6.82]
GENE	HOXB2	homeobox B2	None	GSE22138	Eye cancer	Uveal melanoma	Distant Metastasis Free Survival	BRCIC	Laurent	HG-U133_Plus_2	205453_at	63	0.793651	0.00211853	0.0474817	1.05279	0.0217918	1.91365	6.78 [1.32 - 34.77]
GENE	HOXB2	homeobox B2	None	GSE2837	Head and neck cancer	Squamous cell carcinoma	Relapse Free Survival	VUMC, VAMC, UTMDACC (1992-2005)	Chung	U133_X3P	g4504464_3p_at	28	0.392857	0.0516894	-	-1.01337	0.946198	-0.0223202	0.98 [0.51 - 1.87]
GENE	HOXB2	homeobox B2	None	jacob-00182-CANDF	Lung cancer	Adenocarcinoma	Overall Survival	CAN/DF	Shedden	HG-U133A	205453_at	82	0.487805	0.137421	-	-0.507008	0.770972	-0.0566749	0.94 [0.65 - 1.38]
GENE	HOXB2	homeobox B2	None	jacob-00182-HLM	Lung cancer	Adenocarcinoma	Overall Survival	HLM	Shedden	HG-U133A	205453_at	79	0.683544	0.22401	-	-0.351844	0.539426	-0.0832098	0.92 [0.71 - 1.20]
GENE	HOXB2	homeobox B2	None	MICHIGAN-LC	Lung cancer	Adenocarcinoma	Overall Survival	Michigan (1994-2000)	Beer	HuGeneFL	X16665_at	86	0.372093	0.0563043	-	-0.764592	0.718461	-0.144904	0.87 [0.39 - 1.90]
GENE	HOXB2	homeobox B2	None	jacob-00182-MSK	Lung cancer	Adenocarcinoma	Overall Survival	MSK	Shedden	HG-U133A	205453_at	104	0.663462	0.0185184	0.253714	-0.947694	0.0648872	-0.388352	0.68 [0.45 - 1.02]
GENE	HOXB2	homeobox B2	None	GSE13213	Lung cancer	Adenocarcinoma	Overall Survival	Nagoya (1995-1999, 2002-2004)	Tomida	G4112F	A_23_P107283	117	0.752137	0.0875613	-	0.516187	0.823906	0.0242205	1.02 [0.83 - 1.27]
GENE	HOXB2	homeobox B2	None	GSE13213	Lung cancer	Adenocarcinoma	Overall Survival	Nagoya (1995-1999, 2002-2004)	Tomida	G4112F	A_24_P33077	117	0.752137	0.0593607	-	0.571378	0.775306	0.0350055	1.04 [0.81 - 1.32]
GENE	HOXB2	homeobox B2	None	GSE31210	Lung cancer	Adenocarcinoma	Overall Survival	NCCRI	Okayama	HG-U133_Plus_2	205453_at	204	0.671569	0.0255558	0.317787	0.795975	0.10885	0.415022	1.51 [0.91 - 2.52]
GENE	HOXB2	homeobox B2	None	GSE31210	Lung cancer	Adenocarcinoma	Relapse Free Survival	NCCRI	Okayama	HG-U133_Plus_2	205453_at	204	0.661765	0.000208322	0.00665953	0.974528	0.0215727	0.441368	1.55 [1.07 - 2.27]
GENE	HOXB2	homeobox B2	None	jacob-00182-UM	Lung cancer	Adenocarcinoma	Overall Survival	UM	Shedden	HG-U133A	205453_at	178	0.820225	0.116158	-	0.370536	0.589549	0.0680804	1.07 [0.84 - 1.37]
GENE	HOXB2	homeobox B2	None	GSE3141	Lung cancer	NSCLC	Overall Survival	Duke	Bild	HG-U133_Plus_2	205453_at	111	0.108108	0.00397143	0.07887	-1.00943	0.611713	-0.0926001	0.91 [0.64 - 1.30]
GENE	HOXB2	homeobox B2	None	GSE14814	Lung cancer	NSCLC	Overall Survival	JRB.10	Zhu	HG-U133A	205453_at	90	0.666667	0.145903	-	0.473916	0.563263	0.176339	1.19 [0.66 - 2.17]
GENE	HOXB2	homeobox B2	None	GSE14814	Lung cancer	NSCLC	Disease Specific Survival	JRB.10	Zhu	HG-U133A	205453_at	90	0.777778	0.0865202	-	0.658009	0.76579	0.107038	1.11 [0.55 - 2.25]
GENE	HOXB2	homeobox B2	None	GSE8894	Lung cancer	NSCLC	Relapse Free Survival	Seoul (1995-2005)	Lee	HG-U133_Plus_2	205453_at	138	0.108696	0.0538775	-	0.957292	0.694765	-0.0364147	0.96 [0.80 - 1.16]
GENE	HOXB2	homeobox B2	None	GSE4573	Lung cancer	Squamous cell carcinoma	Overall Survival	Michigan (1991-2002)	Raponi	HG-U133A	205453_at	129	0.860465	0.0121889	0.187189	0.762558	0.841974	0.0400191	1.04 [0.70 - 1.54]
GENE	HOXB2	homeobox B2	None	GSE17710	Lung cancer	Squamous cell carcinoma	Overall Survival	UNC	Wilkerson	Agilent-UNC-custom-4X44K	21800	56	0.642857	0.026794	0.328224	0.787994	0.190784	0.253225	1.29 [0.88 - 1.88]
GENE	HOXB2	homeobox B2	None	GSE17710	Lung cancer	Squamous cell carcinoma	Relapse Free Survival	UNC	Wilkerson	Agilent-UNC-custom-4X44K	41309	56	0.857143	3.25262e-05	0.00129198	1.72617	0.133271	0.530363	1.70 [0.85 - 3.40]
GENE	HOXB2	homeobox B2	None	GSE17710	Lung cancer	Squamous cell carcinoma	Relapse Free Survival	UNC	Wilkerson	Agilent-UNC-custom-4X44K	22230	56	0.660714	0.00788026	0.134744	0.891682	0.0753409	0.338181	1.40 [0.97 - 2.04]
GENE	HOXB2	homeobox B2	None	GSE17710	Lung cancer	Squamous cell carcinoma	Overall Survival	UNC	Wilkerson	Agilent-UNC-custom-4X44K	41309	56	0.892857	0.00163702	0.0384133	1.48016	0.251203	0.429112	1.54 [0.74 - 3.20]
GENE	HOXB2	homeobox B2	None	GSE17710	Lung cancer	Squamous cell carcinoma	Relapse Free Survival	UNC	Wilkerson	Agilent-UNC-custom-4X44K	21800	56	0.642857	0.0102069	0.163967	0.856171	0.0922441	0.318025	1.37 [0.95 - 1.99]
GENE	HOXB2	homeobox B2	None	GSE17710	Lung cancer	Squamous cell carcinoma	Overall Survival	UNC	Wilkerson	Agilent-UNC-custom-4X44K	22230	56	0.642857	0.026794	0.328224	0.787994	0.157529	0.275408	1.32 [0.90 - 1.93]
GENE	HOXB2	homeobox B2	None	GSE9891	Ovarian cancer		Overall Survival	AOCS, RBH, WH, NKI-AVL (1992-2006)	Tothill	HG-U133_Plus_2	205453_at	278	0.294964	0.0340867	0.385584	-0.412382	0.384718	-0.0731326	0.93 [0.79 - 1.10]
GENE	HOXB2	homeobox B2	None	DUKE-OC	Ovarian cancer		Overall Survival	Duke	Bild	HG-U133A	205453_at	133	0.105263	0.0230467	0.295919	-0.734611	0.304584	-0.0692222	0.93 [0.82 - 1.06]
GENE	HOXB2	homeobox B2	None	GSE8841	Ovarian cancer		Overall Survival	Milan (1992-2003)	Marchini	G4100A	16622	81	0.62963	0.136983	-	0.77232	0.215347	0.396378	1.49 [0.79 - 2.78]
GENE	HOXB2	homeobox B2	None	GSE26712	Ovarian cancer		Disease Free Survival	MSKCC (1990-2003)	Bonome	HG-U133_Plus_2	205453_at	185	0.486486	0.0146837	0.214645	0.405366	0.0420199	0.240743	1.27 [1.01 - 1.60]
GENE	HOXB2	homeobox B2	None	GSE26712	Ovarian cancer		Overall Survival	MSKCC (1990-2003)	Bonome	HG-U133_Plus_2	205453_at	185	0.545946	0.0401789	0.428899	0.369184	0.122305	0.198396	1.22 [0.95 - 1.57]
GENE	HOXB2	homeobox B2	None	GSE17260	Ovarian cancer		Progression Free Survival	Niigata (1997-2008)	Yoshihara	G4112A	A_23_P107283	110	0.536364	0.0675937	-	-0.429901	0.417254	-0.0531911	0.95 [0.83 - 1.08]
GENE	HOXB2	homeobox B2	None	GSE17260	Ovarian cancer		Overall Survival	Niigata (1997-2008)	Yoshihara	G4112A	A_24_P33077	110	0.781818	0.0763814	-	-0.721293	0.715674	-0.0359278	0.96 [0.80 - 1.17]
GENE	HOXB2	homeobox B2	None	GSE17260	Ovarian cancer		Overall Survival	Niigata (1997-2008)	Yoshihara	G4112A	A_23_P107283	110	0.736364	0.151092	-	-0.515303	0.7176	-0.0292866	0.97 [0.83 - 1.14]
GENE	HOXB2	homeobox B2	None	GSE17260	Ovarian cancer		Progression Free Survival	Niigata (1997-2008)	Yoshihara	G4112A	A_24_P33077	110	0.790909	0.155272	-	-0.430067	0.586605	-0.0452148	0.96 [0.81 - 1.12]
GENE	HOXB2	homeobox B2	None	GSE14764	Ovarian cancer		Overall Survival	TOC	Denkert	HG-U133A	205453_at	80	0.75	0.0722397	-	-1.25668	0.248838	-0.214111	0.81 [0.56 - 1.16]
GENE	HOXB2	homeobox B2	None	GSE16560	Prostate cancer		Overall Survival	Sweden (1977-1999)	Sboner	6K DASL	DAP3_1110	281	0.580071	0.0196779	0.264889	-0.336158	0.139201	-0.13536	0.87 [0.73 - 1.05]
GENE	HOXB2	homeobox B2	None	E-DKFZ-1	Renal cell carcinoma		Overall Survival	RZPD	Sueltmann	A-RZPD-20	rzpd.de:huber1:Reporter:IMAGE:789240	59	0.525424	0.241431	-	0.586918	0.806806	0.226785	1.25 [0.20 - 7.72]
GENE	HOXB2	homeobox B2	None	GSE19234	Skin cancer	Melanoma	Overall Survival	NYU	Bogunovic	HG-U133_Plus_2	205453_at	38	0.710526	0.0183156	0.251731	1.11481	0.56938	0.126997	1.14 [0.73 - 1.76]
GENE	HOXB2	homeobox B2	None	GSE30929	Soft tissue cancer	Liposarcoma	Distant Recurrence Free Survival	MSKCC (1993-2008)	Gobble	HG-U133A	205453_at	140	0.892857	1.78209e-06	9.26066e-05	1.47897	0.00231763	0.950797	2.59 [1.40 - 4.77]
Using the prognoscan database, we investigated the relationship between HOXB2 expression and cancer prognosis. Specifically, we discovered that the prognosis of breast cancer, colorectal cancer, lung cancer, blood cancer,
and ovarian cancer is correlated with the expression of HOXB2. (Cox P-value < 0.05)
