# Supplementary material for: HOXB2 Is a Prognostic Biomarker and Correlated with Immune Infiltration in Colorectal Cancer and Glioma
Source: Research Square preprint supplement (doi:10.21203/rs.3.rs-2898626/v1), 2023-05-17
Supplement: Supplementary file 2 [file 067ce9841823915ea1478895.xlsx]

## Sheet: Sheet1
Supplementary Table 5: The primer sequences used in RT-qPCR
hsa-β-actin -FP		TTCCTTCCTGGGCATGGAGTC
hsa-β-actin -RP		TCTTCATTGTGCTGGGTGCC
