# Supplementary material for: HOXB2 Is a Prognostic Biomarker and Correlated with Immune Infiltration in Colorectal Cancer and Glioma
Source: Research Square preprint supplement (doi:10.21203/rs.3.rs-2898626/v1), 2023-05-17
Supplement: Supplementary file 3 [file 3546154b88f73503eb183c31.xlsx]

## Sheet: Sheet1
Supplementary Table 2: The correlations between HOXB2 and TIICs in various cancer types by TIMER.
cancer	purity		B cell		CD8+ T cell		CD4+ T cell		Macrophage		Neutrophil		Dendritic Cell
	cor	p	cor	p	cor	p	cor	p	cor	p	cor	p	cor	p
ACC	0.083	0.483	0.189	0.109	0.19	0.107	0.34	0.32	0.108	0.365	0.146	0.218	0.221	0.0589
BLCA	0.017	0.748	0.055	0.3	-0.03	0.566	0.142	0.0064	0.096	0.067	0.067	0.203	0.023	0.66
BRCA	-0.038	0.3	-0.094	0.00313	0.032	0.318	-0.018	0.568	0.042	0.184	-0.051	0.119	-0.073	0.0246
CESC	0.023	0.707	0.141	0.0186	0.01	0.886	0.068	0.256	0.146	0.0148	-0.012	0.846	-0.141	0.0189
CHOL	-0.421	0.0105	5.66	0.000396	0.575	0.000305	0.265	0.125	0.449	0.00685	0.377	0.0256	0.531	0.00102
COAD	-0.285	4.71e-09	0.246	5.32e-07	0.314	9.23e-11	0.392	2.98e-16	0.408	1.25e-17	0.483	7.14e-25	0.528	3.04e-30
DLBC	-0.726	5.36e-08	0.255	0.307	0.197	0.393	0.312	0.169	-0.241	0.293	0.23	0.317	0.114	0.622
ESCA	-0.126	0.0921	0.048	0.524	0.034	0.646	0.063	0.404	0.195	0.0086	0.015	0.864	0.096	0.201
GBM	0.011	0.817	0.089	0.069	-0.163	0.000853	-0.018	0.711	-0.021	0.672	-0.003	0.953	0.184	0.00015
HNSC	-0.046	0.346	0.305	1.08e-11	0.166	0.000274	0.247	4.28e-08	0.344	7.6e-15	0.038	0.413	0.22	1.08e-06
KICH	-0.16	0.199	0.296	0.0166	0.354	0.00382	0.042	0.741	0.409	0.000722	0.176	0.161	0.417	0.000584
KIRC	0.05	0.282	0.021	0.658	0.098	0.0398	0.109	0.019	-0.031	0.517	0.059	0.209	0.02	0.678
KIRP	0.008	0.895	-0.026	0.681	-0.14	0.0247	0.006	0.921	-0.043	0.495	0.124	0.0458	0.03	0.633
LGG	-0.134	0.00319	0.273	1.24e-09	0.048	0.295	0.474	4.35e-28	0.496	1.07e-30	0.448	7.09e-25	0.443	2.87e-24
LIHC	-0.465	6.14e-20	0.3	1.35e-08	0.42	4.94e-16	0.448	2.04e-18	0.465	1.06e-19	0.427	1.1e-16	0.462	2.24e-19
LUAD	-0.194	1.39e-05	0.186	3.86e-05	0.022	0.622	0.25	2.35e-08	0.156	0.000587	0.205	5.72e-06	0.21	2.8e-06
LUSC	-0.22	1.21e-06	0.188	4.06e-05	0.089	0.0522	0.3	2.39e-11	0.204	7.02e-06	0.286	2.05e-10	0.281	5.08e-10
MESO	0.122	0.263	-0.287	0.00823	-0.101	0.359	-0.105	0.341	0.192	0.0802	0.066	0.551	-0.302	0.00518
OV	-0.055	0.228	0.026	0.568	0.065	0.158	-0.04	0.38	0.042	0.359	0.09	0.0494	0.045	0.321
PAAD	0.068	0.373	0.151	0.0492	0.18	0.0182	0.115	0.136	0.223	0.00337	0.19	0.013	0.224	0.00318
PCPG	0.055	0.475	0.077	0.32	0.203	0.00837	0.063	0.416	0.035	0.654	-0.04	0.611	0.227	0.00313
PRAD	-0.456	7.96e-23	0.323	1.99e-11	0.199	4.48e-05	0.481	3.59e-25	0.505	2.43e-28	0.414	1.43e-18	0.449	6.15e-22
READ	-0.282	0.000733	0.094	0.269	-0.005	0.956	0.405	7.73e-07	0.315	0.000162	0.258	0.00222	0.462	1.02e-08
SARC	0.035	0.589	0.096	0.139	0.122	0.0592	-0.078	0.231	-0.018	0.786	-0.036	0.577	0.071	0.27
SKCM	-0.1	0.0323	0.112	0.0181	0.118	0.0135	0.067	0.155	0.187	6.5e-05	0.23	7.64e-07	0.169	0.000347
STAD	-0.079	0.126	0.128	0.0136	0.074	0.157	0.265	2.7e-07	0.355	1.91e-12	0.069	0.186	0.167	0.00124
TGCT	-0.001	0.919	-0.185	0.0246	-0.099	0.231	-0.16	0.0543	-0.123	0.138	-0.106	0.2	-0.116	0.162
THCA	-0.08	0.0764	0.242	7.71e-08	0.356	5.43e-16	0.091	0.0441	0.107	0.0184	0.418	5e-22	0.456	2.64e-26
THYM	-0.276	0.00273	0.549	2.55e-10	0.468	1.56e-07	0.52	5.14e-09	0.394	1.44e-05	-0.012	0.9	0.574	2.49e-11
UCEC	-0.136	0.0194	-0.048	0.413	-0.032	0.592	-0.001	0.98	0.101	0.0861	0.091	0.12	-0.013	0.831
UCS	-0.313	0.0213	0.055	0.697	-0.217	0.118	0.142	0.311	0.15	0.283	0.142	0.31	-0.059	0.672
UVM	0.079	0.494	-0.294	0.0105	0.173	0.134	0.107	0.357	0.158	0.211	-0.014	0.904	0.043	0.713
