# Supplementary material for: HOXB2 Is a Prognostic Biomarker and Correlated with Immune Infiltration in Colorectal Cancer and Glioma
Source: Research Square preprint supplement (doi:10.21203/rs.3.rs-2898626/v1), 2023-05-17
Supplement: Supplementary file 4 [file 43d34fa32f86ea5066b576a6.xlsx]

## Sheet: Sheet 1
Supplementary Table 4: The correlations between ATF3 and TIICs in LGG by R package.
Gene	Cell types	Correlation(Pearson)	p.adj value(Pearson)	Correlation(Spearman)	p.adj value(Spearman)
ATF3	aDC	0.421	<0.001	0.408	<0.001
ATF3	B cells	0.239	<0.001	0.235	<0.001
ATF3	CD8 T cells	0.268	<0.001	0.243	<0.001
ATF3	Cytotoxic cells	0.426	<0.001	0.451	<0.001
ATF3	DC	0.109	0.012	0.125	0.004
ATF3	Eosinophils	0.471	<0.001	0.472	<0.001
ATF3	iDC	0.384	<0.001	0.421	<0.001
ATF3	Macrophages	0.503	<0.001	0.523	<0.001
ATF3	Mast cells	0.185	<0.001	0.170	<0.001
ATF3	Neutrophils	0.524	<0.001	0.517	<0.001
ATF3	NK CD56bright cells	-0.072	0.100	-0.077	0.079
ATF3	NK CD56dim cells	0.306	<0.001	0.335	<0.001
ATF3	NK cells	0.286	<0.001	0.320	<0.001
ATF3	pDC	-0.186	<0.001	-0.223	<0.001
ATF3	T cells	0.373	<0.001	0.393	<0.001
ATF3	T helper cells	0.197	<0.001	0.187	<0.001
ATF3	Tcm	0.036	0.414	0.024	0.583
ATF3	Tem	0.122	0.005	0.088	0.044
ATF3	TFH	0.047	0.284	0.056	0.195
ATF3	Tgd	-0.020	0.652	0.011	0.792
ATF3	Th1 cells	0.448	<0.001	0.421	<0.001
ATF3	Th17 cells	0.268	<0.001	0.295	<0.001
ATF3	Th2 cells	0.143	<0.001	0.115	0.008
ATF3	TReg	-0.133	0.002	-0.168	<0.001
